# Supplementary material for: Interspecies comparison in the COMT-mediated methylation of 3-BTD
Source: PubMed Central journal article supplement — RSC Adv. 2018 May 1;8(29):16278–84. doi: 10.1039/c8ra01938j (PMC9080226; doi:10.1039/c8ra01938j), 2018-05-01
Supplement: RA-008-C8RA01938J-s001.pdf [file RA-008-C8RA01938J-s001.pdf]

**Supplementary information for**

**Interspecies comparison in COMT-mediated methylation of 3-BTD**

Yang-Liu Xia<sup>a</sup>, Hui-Lin Pang<sup>a</sup>, Tong-Yi Dou<sup>a</sup>, Ping Wang<sup>b</sup>, Guang-Bo Ge<sup>b</sup>

*<sup>a</sup>School of Life Science and Medicine, Dalian University of Technology, Panjin 124221, China.*

*<sup>b</sup>Shanghai University of Traditional Chinese Medicine, Shanghai 201210, China*

Address for correspondence:

Dr. Tong-Yi Dou, School of Life Science and Medicine, Dalian University of Technology, Panjin 124221, China. E-mail: [douty@dlut.edu.cn](mailto:douty@dlut.edu.cn)

Dr. Ping Wang & Guang-Bo Ge, Shanghai University of Traditional Chinese Medicine, Shanghai 201210, China. E-mail: [s200541025@126.com](mailto:s200541025@126.com) & [gegbdicp@sohu.com](mailto:gegbdicp@sohu.com)

Table S1. Percent Identity Matrix of similarity of amino acid sequences between COMT from different species. (Created by Clustal W)

|            | Human | Monkey | Pig   | Rabbit | Dog   | Guinea pig | Rat   | Mouse |
|------------|-------|--------|-------|--------|-------|------------|-------|-------|
| Human      | 100   | 91.85  | 76.3  | 75     | 79.55 | 75.19      | 77.65 | 79.17 |
| Monkey     | 91.85 | 100    | 76.3  | 76.12  | 78.44 | 74.81      | 76.89 | 78.03 |
| Pig        | 76.3  | 76.3   | 100   | 70.9   | 78.44 | 70         | 71.21 | 72.73 |
| Rabbit     | 75    | 76.12  | 70.9  | 100    | 72.28 | 75.75      | 76.34 | 78.63 |
| Dog        | 79.55 | 78.44  | 78.44 | 72.28  | 100   | 75.09      | 78.71 | 80.61 |
| Guinea Pig | 75.19 | 74.81  | 70    | 75.75  | 75.09 | 100        | 82.2  | 82.58 |
| Rat        | 77.65 | 76.89  | 71.21 | 76.34  | 78.71 | 82.2       | 100   | 90.53 |
| Mouse      | 79.17 | 78.03  | 72.73 | 78.63  | 80.61 | 82.58      | 90.53 | 100   |

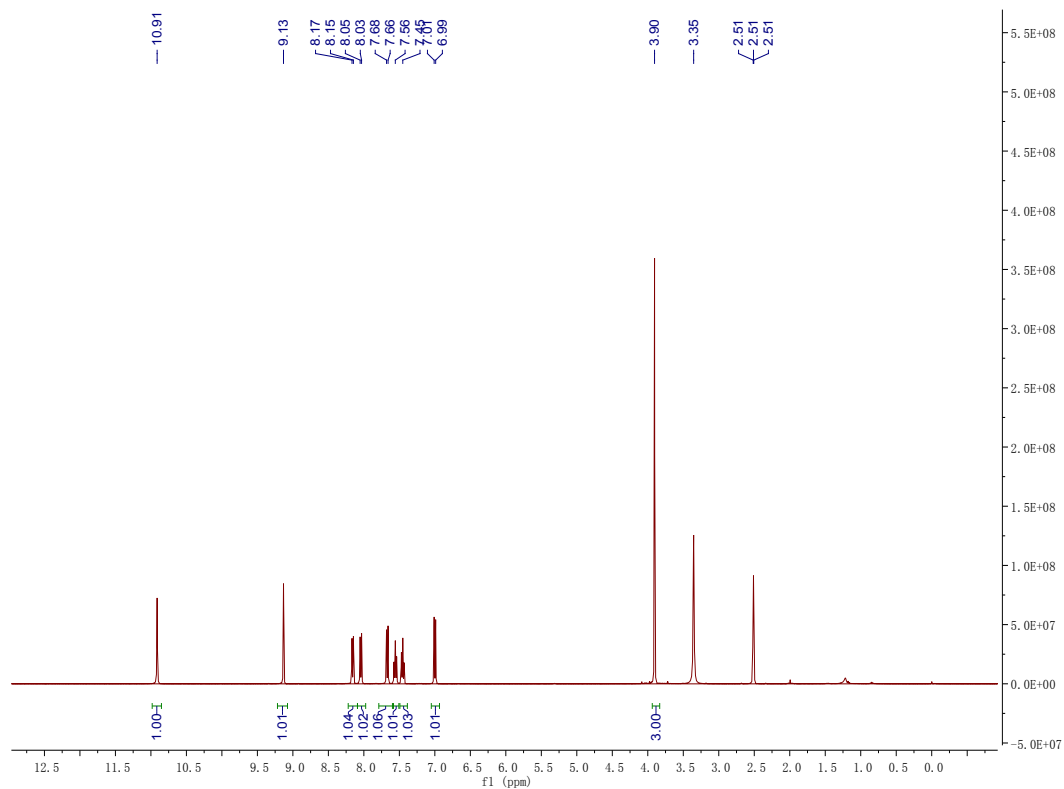

Figure S1.  $^1\text{H}$  NMR (400 MHz, DMSO) spectrum of **3-BTMD**.

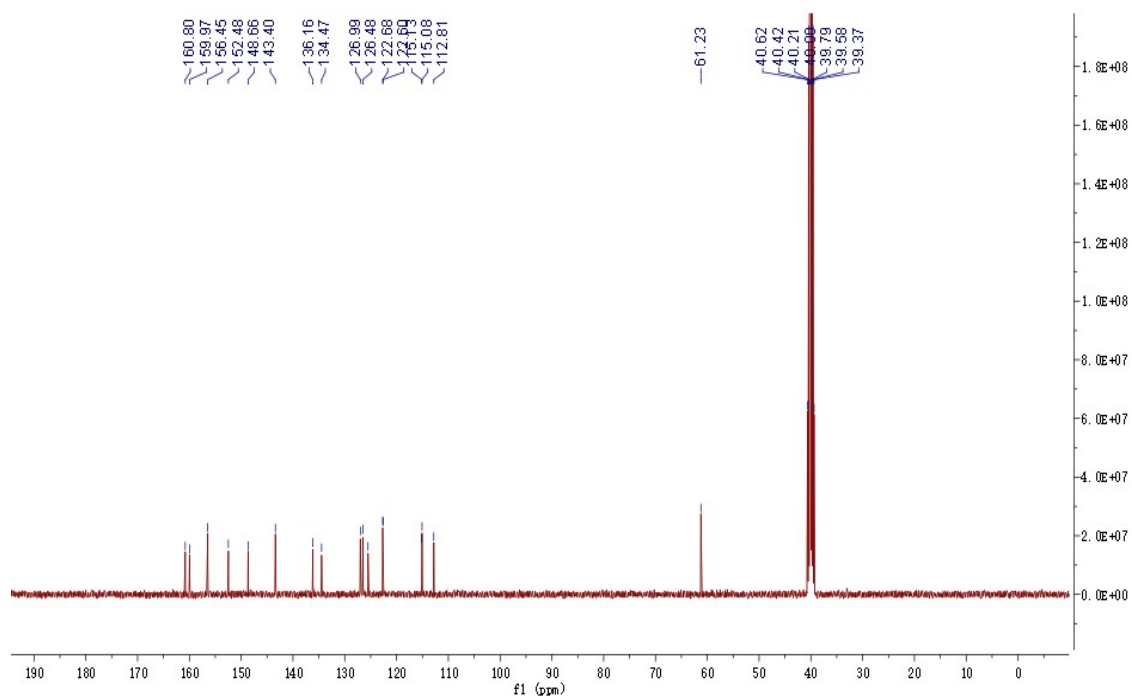

Figure S2.  $^{13}\text{C}$  NMR (100 MHz, DMSO) spectrum of **3-BTMD**.

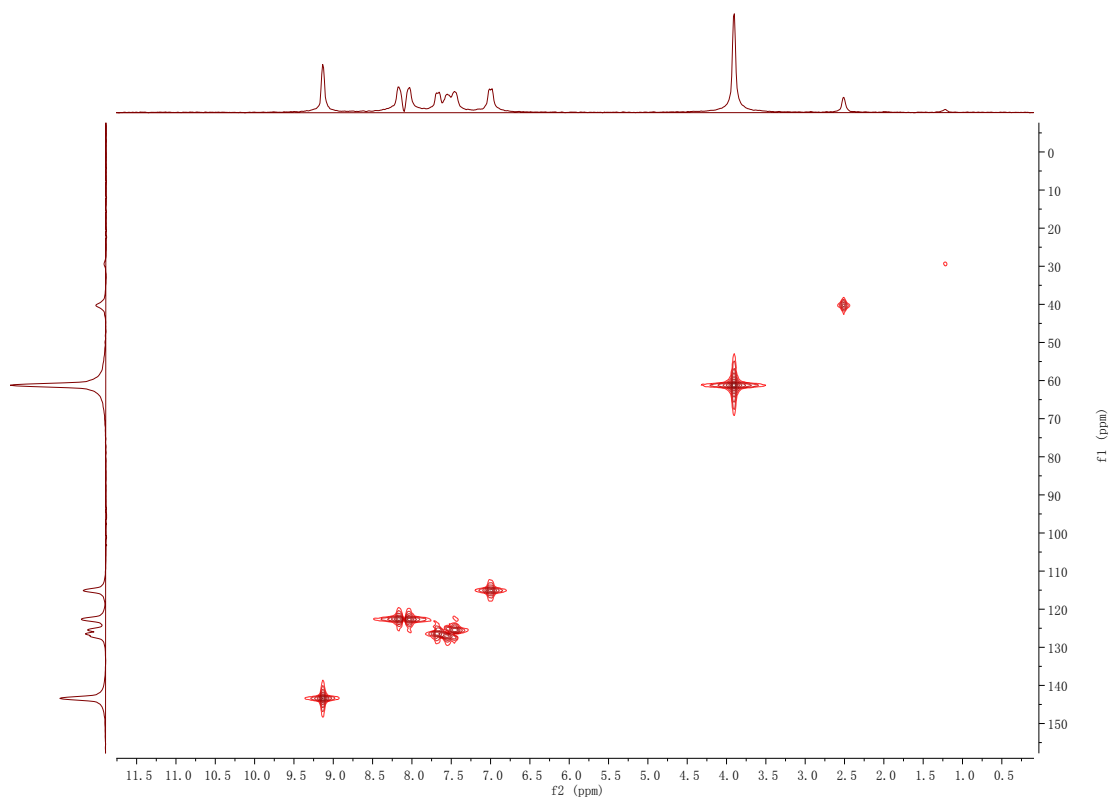

Figure S3. HSQC spectrum of **3-BTMD**.

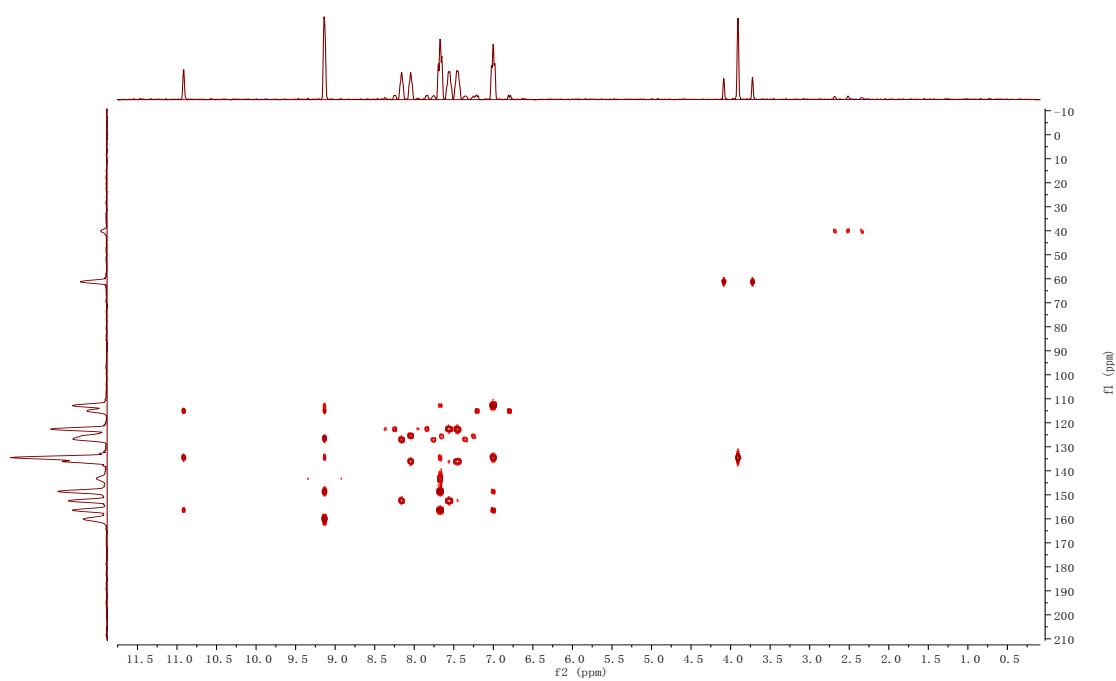

Figure S4. HMBC spectrum of **3-BTMD**.

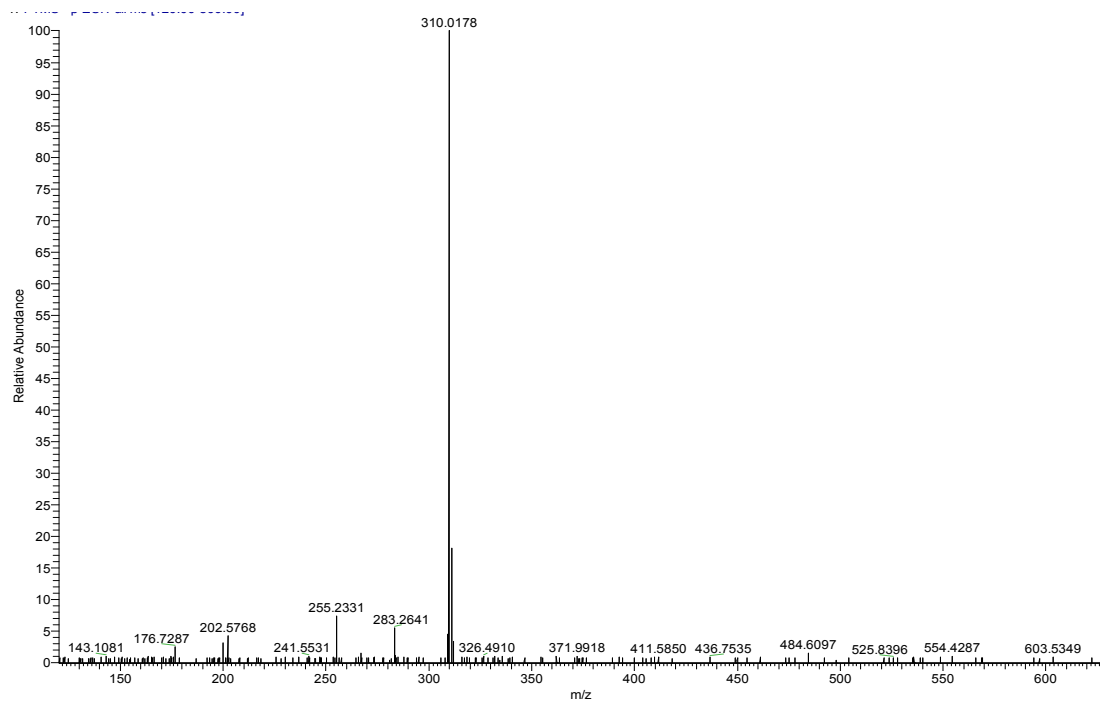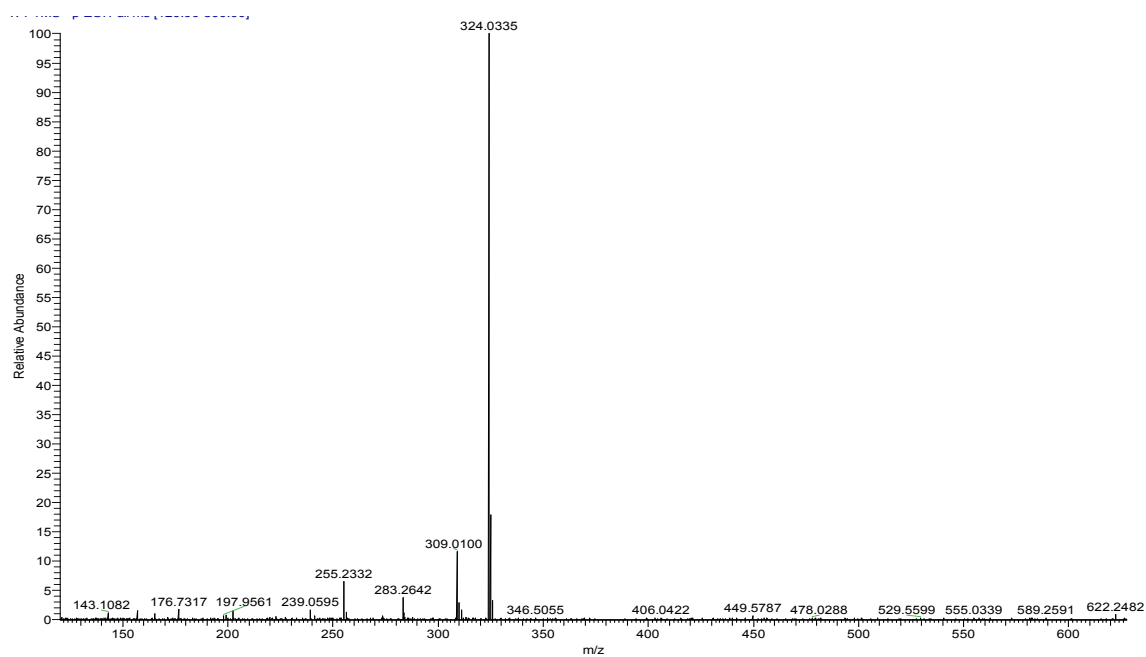

Figure S5. The MS spectrum of 3-BTD and 3-BTMD under positive ion mode.

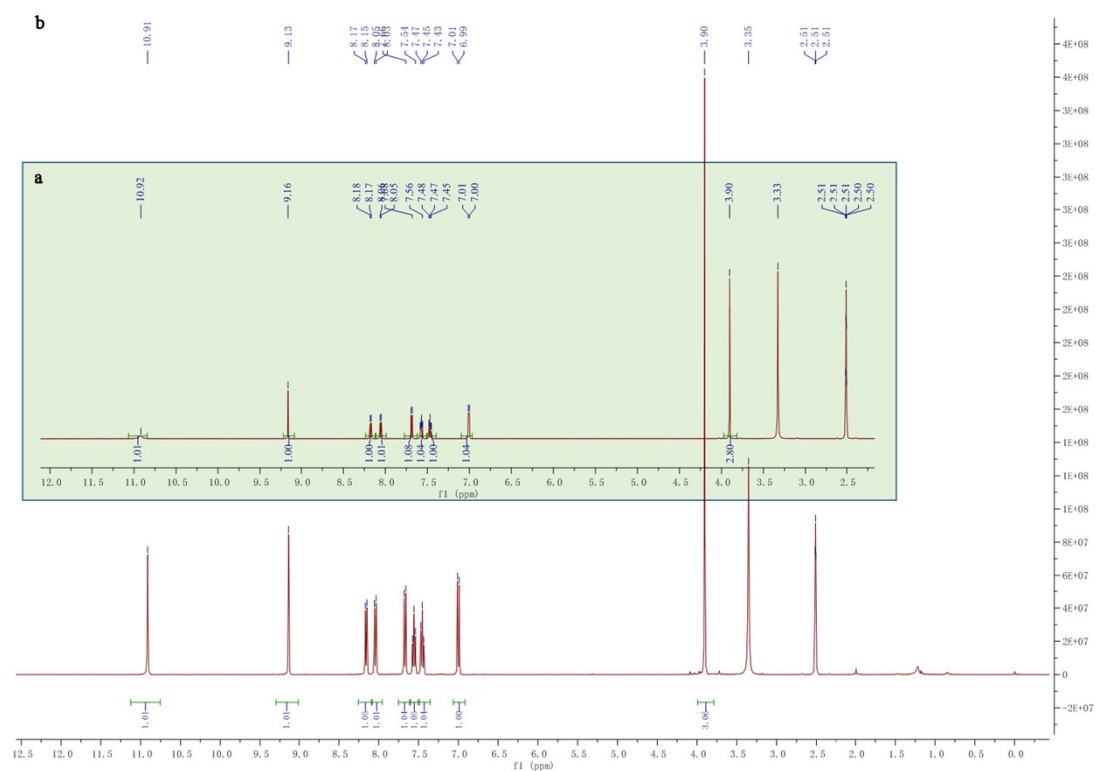

Figure S6. Comparison of  $^1\text{H}$  NMR (400 MHz, DMSO) spectrum of bio- (a) and chem- (b) synthesized product of 3-BTD.

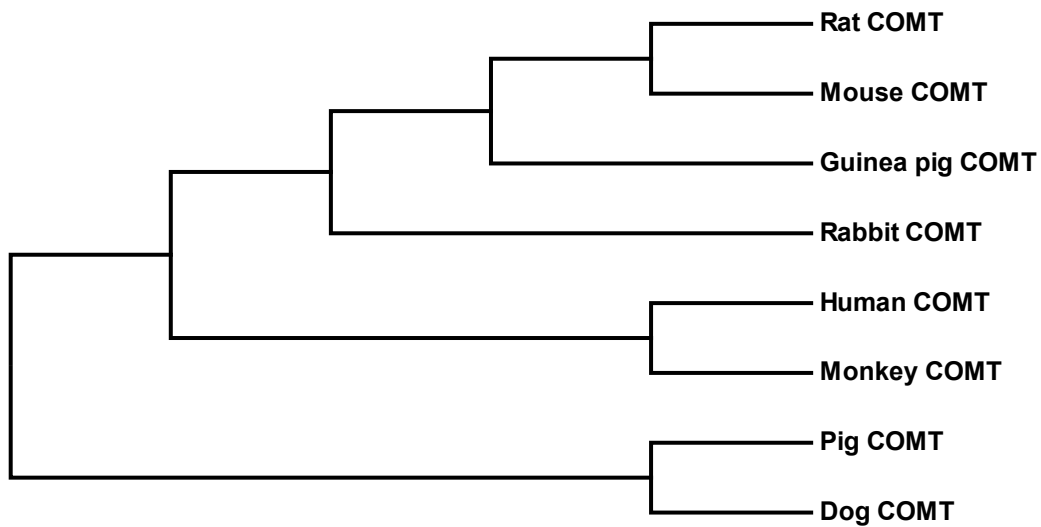

Figure S7. Phylogenetic tree of Catechol-O-methyl transferases (COMT) from different species. (Created by MEGA7.0)

\*All amino acid sequences were inquired from website Ensembl (<http://asia.ensembl.org/index.html>) and NCBI (<https://www.ncbi.nlm.nih.gov/protein/>)

Human COMT: NP\_000745.1 [Homo sapiens]

Rat COMT: NP\_036663.1 [Rattus norvegicus]

Mouse COMT: NP\_031770.2 [Mus musculus]

Monkey COMT: EHH65646.1 [Macaca fascicularis]

Pig COMT: NP\_001182259.1 [Sus scrofa]

Dog COMT: XP\_005636589.1 [Canis familiaris]

Rabbit COMT: G1SQP9 [Oryctolagus cuniculus]

Guinea Pig COMT: H0V363 [Cavia porcellus]
